# Supplementary material
Source: PubMed Central journal article supplement (PMC6031329)
Supplement: joces-131-213884-s1.pdf [file joces-131-213884-s1.pdf]

## Supplementary figures

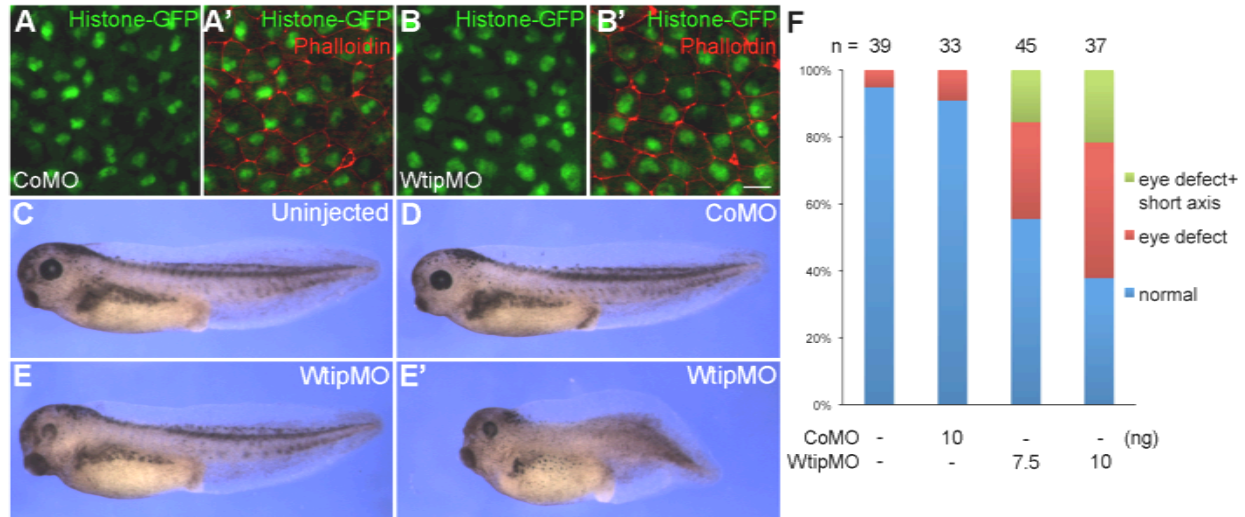

### Fig. S1. Phenotypes of WtipMO-injected embryos.

RNAs encoding Histone-GFP (100 pg) and 7.5 ng of control (CoMO) or Wtip MO (WtipMO) were injected animally into one dorsal blastomere. (A-B') stage 10 animal caps stained with phalloidin to visualize cell boundaries. (C-F) stage 40 embryos uninjected or injected with indicated MOs. WtipMO caused eye defects and in some cases short body axis (E-E'). (F) Frequencies of the defects in the injected embryos. n, number of embryos per group. Data are collected from two independent experiments.

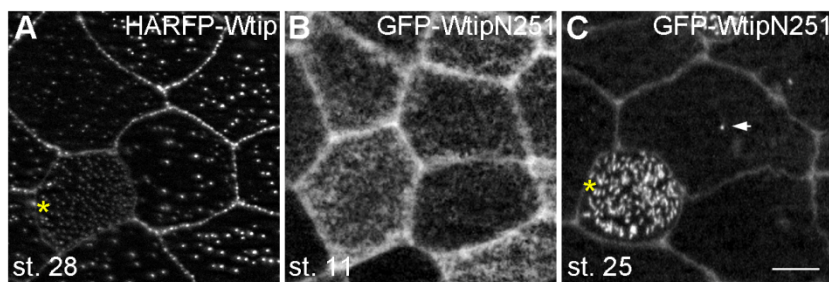

**Figure S2. Wtip is localized to the centrosomes and basal bodies.**

Embryos were injected with indicated RNA, and epifluorescence of epidermal ectoderm is shown at indicated stage. (A) At stage 28, HARFP-Wtip is detected at cell junctions, cytoplasmic puncta in goblet cells and basal bodies of multiciliated cells (asterisk). (B-C) Localization of GFP-WtipN251 at indicated stages. Note the strong signal at the cell junctions, centrosomes (arrow) and basal bodies (asterisk). Scale bar, 10  $\mu$ m.

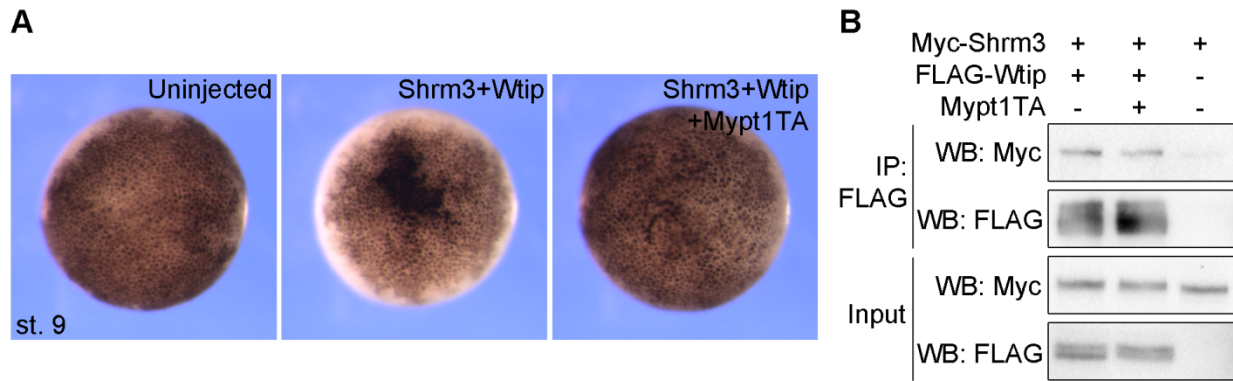

**Figure S3. The association between Wtip and Shroom3 is not regulated by tension.**

RNA injections and immunoprecipitation were carried out as described in Fig. 6 legend, with the addition of Mypt1T696A RNA (Mypt1TA, 100 pg). (A) Stage 9 embryos uninjected or injected with indicated RNAs. Note that Mypt1TA blocked Shroom3 (Shrm3)-induced cell pigmentation associated with apical constriction. (B) Embryos were lysed at stage 12 and subjected to immunoprecipitation. Similar amounts of Myc-Shroom3 were pulled down by FLAG-Wtip in the presence or absence of Mypt1TA.
